# Supplementary material
Source: PubMed Central journal article supplement (PMC3078458)
Supplement: mmc1.pdf [file mmc1.pdf]

## Supplemental Figure S1

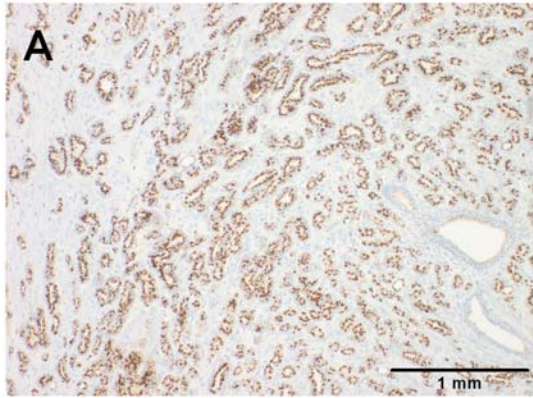

CANT1 antibody

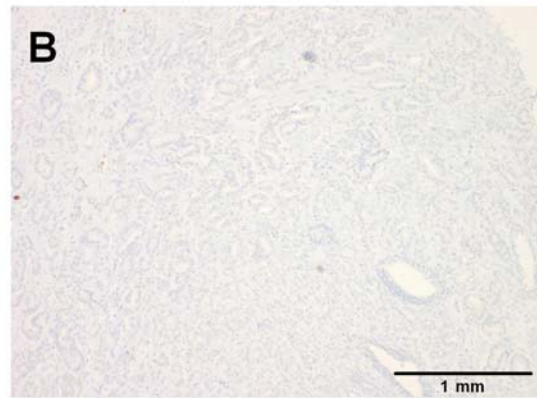

CANT1 antibody + CANT1 recombinant protein

### Supplemental Figure S1 Blocking of immunohistochemistry with recombinant protein.

**A, B)** Consecutive slides of Prostate adenocarcinoma stained with CANT1 antibody, magnification 25x. B) antibody pre-incubated with CANT1 recombinant protein.
