# Supplementary material
Source: PubMed Central journal article supplement (PMC3078458)
Supplement: mmc2.pdf [file mmc2.pdf]

## Supplemental Figure S2

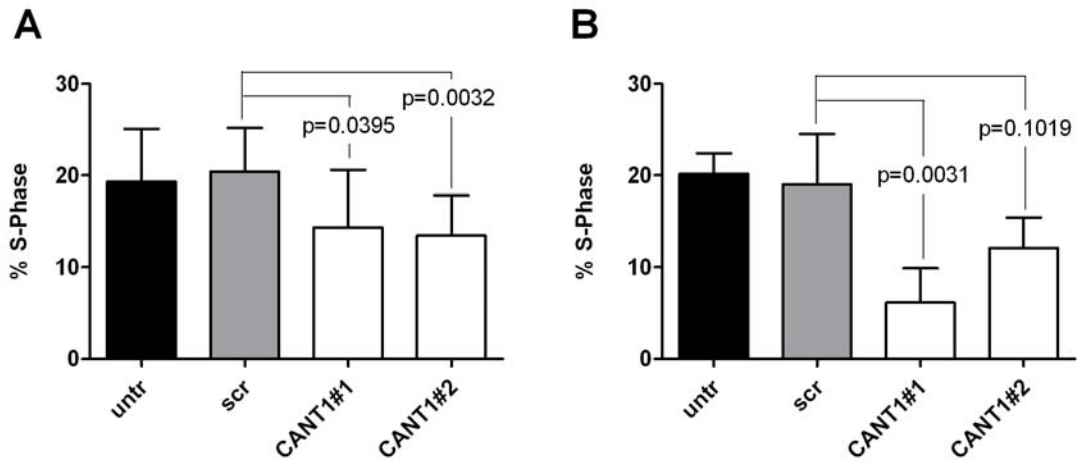

### Supplemental Figure S2 Cell cycle distribution in CANT1 knockdown cells (S-Phase).

500'000 LNCaP cells (**A**) and 200'000 PC-3 cells (**B**) that were left untreated (due to higher proliferation rates, compare Fig. 6a,b) or 600'000 LNCaP cells and 400'000 PC-3 cells that were transfected with siRNAs as indicated were seeded in 6 cm-dishes. After 72 hours cell cycle analysis was performed as described above. Proportion of cells in S-phase from all replicates is shown.
